# Supplementary material
Source: ML conference proceedings conference paper supplement (https://openaccess.thecvf.com/content/CVPR2024/html/Qi_GPT4Point_A_Unified_CVPR_2024_paper.html)
Supplement: Supplementary file 1 [file Qi_GPT4Point_A_Unified_CVPR_2024_supplemental.pdf]

# Appendix

## Contents

- A. Supplementary Material Introduction** 1
- B. Additional Related Work** 1
  - B.1. The Family of LLMs and MLLMs . . . . . 1
  - B.2. The development of Point-text Multimodal . . . . . 1
- C. Additional Method** 2
  - C.1. Pyramid-XL: Data Annotation Engine . . . . . 2
  - C.2. Point Diffusion Architecture . . . . . 3
- D. Additional Benchmark** 3
  - D.1. Objaverse-XL QA Dataset . . . . . 3
  - D.2. Anomalous Objects: Generation Failure Cases . . . . . 3
- E. Additional Experiments** 3
  - E.1. Training Details . . . . . 4
  - E.2. Point-text Captions and QA Demos . . . . . 4
  - E.3. Point Diffusion Results . . . . . 4

### A. Supplementary Material Introduction

In this supplementary material, we extend the discussions presented in the main conference paper. Appendix B provides a more in-depth exploration of related work, focusing on defining the scope of large language models family and examining the developments in point-text multimodal approaches. Appendix C supplements more details about the data annotation engine Pyramid-XL and the diffusion architecture. Moving to Appendix D, we expand on the superiority of our benchmark. Initially, we introduce examples from our ObjaverseXL-LVIS QA 1K dataset, which includes concise QAs for evaluation and long QAs for instructive tuning. Then, we show more 3D generation failure cases where GPT4Point can figure it out while 2D VLM can not underscore the necessity and relevance of our 3D point-text benchmark. Finally, in Appendix E, we give more qualitative results of Point-text inference tasks, including caption and QA tasks and Controllable point diffusion.

### B. Additional Related Work

In this section, we provide detailed insights into related work. Appendix B.1 classifies key concepts of large language models, including LLMs, MLLMs, and VLMs. Appendix B.2 presents the evolution of point-text multimodal models through an illustrative flowchart.

#### B.1. The Family of LLMs and MLLMs

Although the concepts related to large language models are already familiar, we still wish to detail these concepts here. We briefly introduce some families of LLMs and MLLMs. First are the LLMs based on the Transformer architecture, such as ChatGPT [16] and GPT-4 [17]. Currently, there

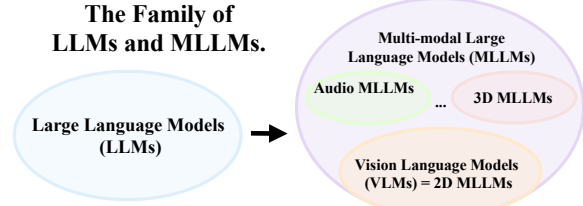

Figure S1. The Family of LLMs and MLLMs.

are several open-source, deployable models [4, 20, 23, 25]. They exhibit strong comprehension and reasoning abilities after extensive pre-training on a vast corpus. Multimodal Large Models (MLLMs) aim to enable LLMs to understand information in other modalities. The fundamental approach involves retrieving text features with other modality features. Among them, image-text multimodal large models, also known as 2D MLLMs or Visual Language Models (VLMs), stand out due to the abundant image-text pairs and strong image backbones provided by computer vision [7, 12, 13]. Beyond images, there are other modalities, such as Audio MLLMs [9] that combine with the audio modality and Video MLLMs with the video modality [2]. In the 3D domain, some existing work, like 3D-LLM [8], utilizes 2D image features combined with depth projections to generate 3D features. We propose a unified text understanding and generation model based on point clouds and develop a real 3D MLLM.

#### B.2. The development of Point-text Multimodal

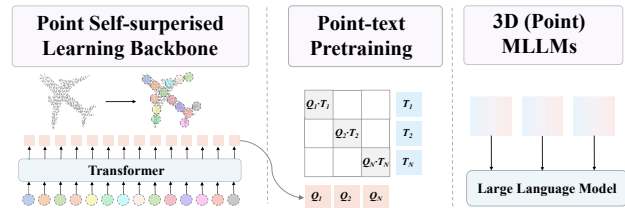

Figure S2. The development of Point-text Multimodal.

This section delves into the evolution of point-text multimodal models for single objects.

- **Backbone Development:** Like texts and images, point clouds undergo self-supervised training for a strong backbone. PointBert exemplifies this, dividing point clouds into patches and reconstructing masked patches via a Transformer-based backbone [24].
- **Text Modality Alignment:** Inspired by CLIP [18], this phase aligns point patches with text features, enhancing the backbone’s processing of textual information.
- **3D MLLMs Integration:** Following the alignment, point features are integrated into LLMs, similar to approaches in VLMs, enabling LLMs to understand point data.

## C. Additional Method

Here, we provide additional information on our method. We first give more details about the data text annotation engine Pyramid-XL in Appendix C.1. And then, in Appendix C.2 about the model architecture, we give the details about the point diffusion branch.

### C.1. Pyramid-XL: Data Annotation Engine

First, we introduce the approach to acquire point clouds from Objaverse-XL [5]. Then, we introduce the cost and prompts of our data annotation engine Pyramid-XL. Finally, we give more qualitative results that finetune the Point-E [15] by our Pyramid-XL level 3 dense captions.

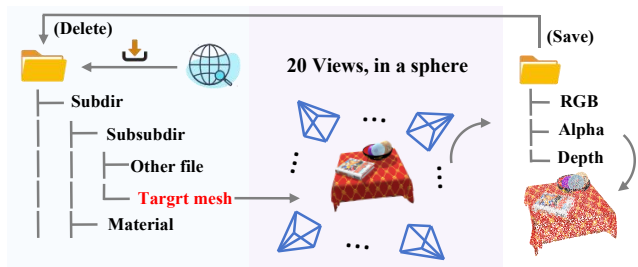

Figure S3. Acquire Data Pipeline from Objaverse-XL [5].

**Acquire data from Objaverse-XL.** Here, we detail our processing approach for the Objaverse-XL dataset [5]. It has 10M objects and is the extension of Objaverse-1.0 [6], which only has 800K 3D objects. Objaverse-XL offers only unprocessed downloads for its 3D objects, most of which originate from sources like GitHub. Downloading these mesh files necessitates completing the project, as materials and related components are often stored in separate directories. Downloading the raw dataset in this format is impractical due to excessive memory requirements, with an average project consuming about 1GB of space. Therefore, we render object images and clear the cache upon completion to manage space. We render 20 random views of each object, capturing the RGB, alpha values, and depth, which are then used to generate point clouds. In addition to the 780K objects from Objaverse-1.0, we rendered an additional 220K from Objaverse-XL, totaling 1M objects.

| Dataset           | Num Obj | Data Type            | Cost/K (GPU + GPT) |
|-------------------|---------|----------------------|--------------------|
| Level 1           | 1M      | Single-View Caption  | \$0.47 + \$0       |
| Level 2 (GPT-4)   | 660K    | Multi-View Caption   | \$4.17 + \$4.18*   |
| Level 2 (ChatGPT) | 660K    | Multi-View Caption   | \$4.17 + \$0.14*   |
| Level 3           | 70K     | QA, Detailed Caption | \$1.64 + \$0       |

Table S1. Comparing Costs across Different Dataset Levels. Costs are calculated based on generating annotation for 1K objects. \* is directly from Cap3D [14]. As levels increase, the cost rises, indicating larger scales for lower-level datasets.

**The cost of the Pyramid-XL.** We now focus on the cost analysis of our data annotation engine, detailed in Tab. S1. The primary costs, detailed under the '1K Cost' column, include GPU resources on the left and GPT API usage on the right. We use the same GPU settings as Cap3D [14], employing A40s on an identical cloud platform. Given GPUs' parallel processing, costs are equal for single or multiple units. For simplicity, we calculate usage time by assuming a single GPU. For Level 1, we use BLIP-2 [12] to generate one short caption for one object. It needs 0.074 hours and costs  $0.074h \times \$1.28/h = \$0.095$ . For Level 2, the cost is the same as the Cap3D [14]. The GPU resource fees include BLIP-2 [12] and CLIP [18]. BLIP-2 generates eight views for each object, each with five captions, so the fee is  $\$0.095 \times 8 \times 5 = \$3.76$ . Moreover, the CLIP uses 0.3h and costs  $0.3h \times \$1.28/h = \$0.38$ . All GPU resource fee is  $\$3.76 + \$0.38 = \$4.17$ . For the GPT API fee, it costs \$0.03/1k tokens and needs 139.3 tokens for each object, and the total cost is  $\$139.3/1000k \times \$0.03/1k \times 1000 = \$4.18$ . For Level 3, We use the open-source Visual Language Model (VLM) Qwen-VL [1] for processing the final captions. It needs 1.28h for the CLIP filter and Qwen-VL generation captions, so the cost is  $1.28h \times \$1.28/h = \$1.64$ .

We can observe that Level 2 captions account for most of the costs, primarily due to GPT usage fees. Our findings show that using GPT-4 for text-based multi-view caption synthesis does not substantially outperform ChatGPT. Furthermore, we can eliminate API call expenses by utilizing open-source Large Language Models (LLMs). The other significant cost is the GPU resources, as it uses BLIP-2 to generate five captions for each view, which can lead to redundancy in information. We can reduce the number of captions and even the number of views for each view.

**The prompts of the Pyramid-XL.** We present the prompt part of the Pyramid-XL data text annotation engine, as illustrated in Fig. S6 and Fig. S7. We primarily illustrate how to construct GPT-based Level 2 captions, ChatCaptioner-based Level 3 short QA pairs, and MLLM-based Level 3 instruction captions and long QA pairs.

For Level 2 captions, we use Level 1 captions of rendered images from 6 views. Through carefully designed prompts, we integrate captions from the six captions to obtain a comprehensive and relatively accurate caption with fewer than 30 words. In our paper, we use GPT-4 to get the comprehensive caption, but we find that ChatGPT can be replaced by GPT-4 to generate Level 2 captions and reduce the cost.

For Level 3 short QA, we follow the approach outlined in ChatCaptioner [26]. We use ChatGPT or other LLMs (we choose Vicuna-7B [4]) as the questioner and BLIP-2 [12] as the answerer. By providing appropriate instructions and context (Level 2 caption) to the LLM and BLIP-2, we observe that LLM generates diverse questions that include color, type, material, purpose, and more. Also, BLIP-

2 tends to output concise answers without restricting the number of words. These form the basis for our Objaverse-XL short QA dataset.

For Level 3 dense captions, we use the Level 2 caption as context, feed the rendering image that best matches the context into MLLM, and input suitable instructions. Due to high-quality conversational performance and cost-effectiveness, we choose the Qwen-VL [1] model to generate. The construction method for Level 3 instruction (long) QA pairs is similar to the above steps, with the critical difference in the instruction variation.

**The effectiveness of Pyramid-XL Level 3 caption.** We use dense captions from Level 3 of Pyramid-XL to finetune Point-E and compare the results with those of Cap3D, as shown in Fig. S11. Ours significantly outperforms Cap3D’s captions, demonstrating the precision of our captions.

### C.2. Point Diffusion Architecture

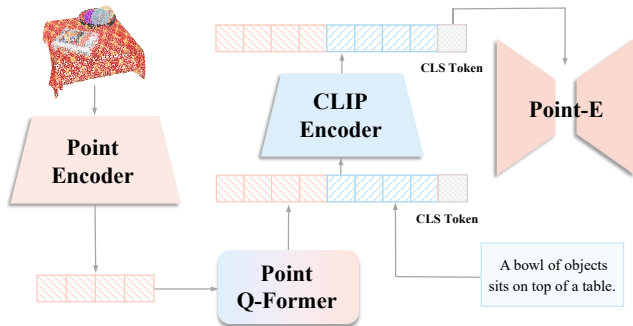

Figure S4. Point Diffusion with GPT4Point.

There are some explorations into controllable text-to-3D work [10, 21, 22]. However, we are attempting to combine understanding and controllable 3D generation. Here, we offer an in-depth look at the Diffusion branch’s structure in Stage 2, illustrated in Fig. S4. Initially, the point cloud undergoes processing via the Point Encoder (Backbone) and Point Q-Former, yielding Q-Former Tokens. For text, instead of Point Q-Former’s text tokenizer, we utilize Point-E’s CLIP tokenizer. The resulting text tokens are then concatenated with the Q-Former Tokens. Subsequently, the CLS token from the Text Token is fed into Point E. The concatenation method in GPT4Point differs notably from BLIP-Diffusion [11]. In BLIP-Diffusion, Q-Former Tokens are inserted between the CLS and input tokens. In contrast, GPT4Point appends Q-Former Tokens directly to the text token sequence, allowing the CLS token to integrate geometric and color information, which is crucial for guiding the 3D generation.

### D. Additional Benchmark

In this section, we mainly introduce some additional content about the benchmark. In Appendix D.1, we give more

examples of the ObjaverseXL QA dataset. Note that the short QA dataset is evaluated based on the accuracy metric. Then, in Appendix D.2, we show more qualitative results about Generation Failure Cases, which can not be recognized by 2D VLMs through a single view but are judged by our GPT4Point.

#### D.1. Objaverse-XL QA Dataset

**Short QA Dataset** In this section, we mainly introduce some additional content about the benchmark. In Appendix D.1, we give more examples of the ObjaverseXL QA dataset. Note that the short QA dataset is evaluated based on the accuracy metric. Then, in Appendix D.2, we show more qualitative results about Generation Failure Cases, which can not be recognized by 2D VLMs through a single view but are judged by our GPT4Point.

**Long (Instruction) QA Dataset** The long (Instruction) QA dataset is used to fine-tune-finetuning the model to enhance the model’s conversational capabilities significantly. We impose length constraints on prompts, requiring approximately 50 words for answers to dense caption questions and at least ten words for other questions. As illustrated in Fig. S8, we constructed a Long (Instruction) QA dataset for 70K objects, comprising 344,996 QA pairs. Among these, 69K data are used for finetuning, while the remaining 1K are reserved for testing. This aims to encourage LLMs to generate long and more comprehensive results.

#### D.2. Anomalous Objects: Generation Failure Cases

In this section, we will demonstrate more qualitative results to show the failure case, which can not be recognized by 2D VLMs through a single view but can be judged by our GPT4Point. This section mainly shows the failure cases produced by the state-of-the-art text-to-3D generation methods like Dream-Gaussian [19] and Fantasia3d [3]. Due to technical constraints, these models will likely generate 3D objects with multi-heads or multi-bodies. If provided with render images from only a single perspective, 2D VLMs [1, 4], and even humans, in most cases, may make incorrect judgments, as illustrated in the upper part of Fig. S9. This hinders the assessment of 3D object generation. However, our GPT4Point provides a better solution to this issue. More examples are showcased in Fig. S9.

### E. Additional Experiments

In this supplementary section, we elaborate on the experimental details. Initially, we present a table in Appendix E.1, enumerating all hyperparameters. Subsequently, we furnish additional qualitative outcomes. Specifically, Appendix E.2 illustrates textual reference tasks, such as 3D object point captioning and QA, while Appendix E.3 showcases our findings regarding point diffusion.

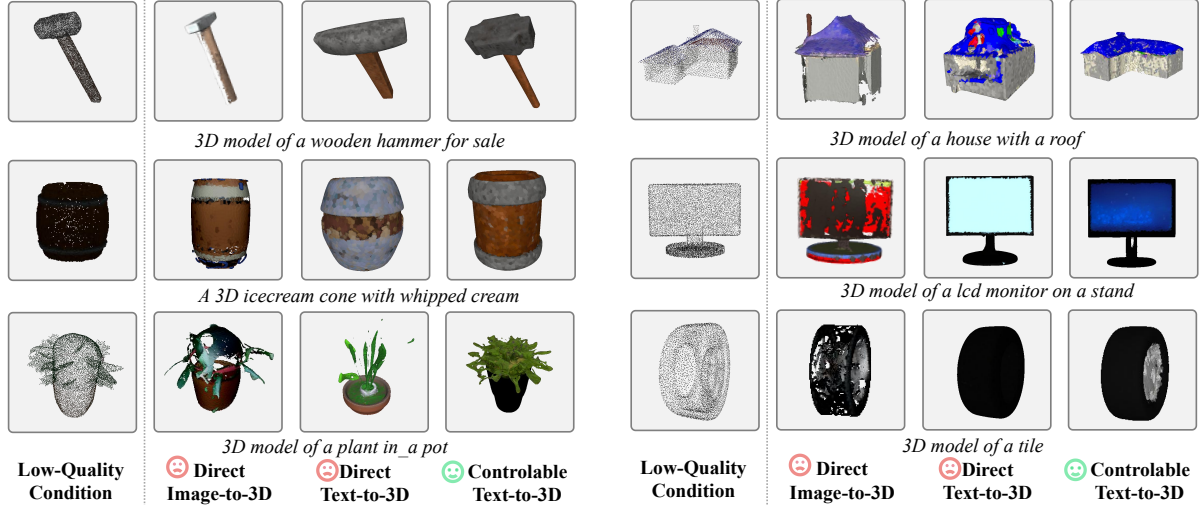

Figure S5. **Point Diffusion Results: our controllable text-to-3D.** Given a low-quality point cloud prior, it can generate outcomes superior to direct text-to-3D and image-to-3D methods and more closely align with the low-quality priors, demonstrating controllability.

| Hyperparameters  | Value/Type       |
|------------------|------------------|
| batchsize        | 32               |
| training epochs  | 10               |
| optimizer        | AdamW            |
| init lr          | 1e-4             |
| min lr           | 1e-5             |
| warmup lr        | 1e-6             |
| weight decay     | 0.05             |
| lr schedule      | cosine annealing |
| warmup type      | linear           |
| warmup iters     | 5000             |
| Point size       | 8192             |
| Q-Former queries | 32               |

Table S2. **Training settings and hyperparameters for Stage1.**

### E.1. Training Details

We detail the hyperparameters of GPT4Point, mainly mirroring those used in BLIP-2 [12] during the training stage. These parameters are maintained for Stage1: Point-text alignment, and the LLM branch in Stage2. Tab. S2 lists them. The parameters for the LLM branch in Stage 2 are almost identical to those of Stage 1, except for the warmup iterations, which changed from 5K to 2K. For BLIP-2, finetuning is performed on a smaller dataset and subtasks after pretraining on multiple datasets. Additionally, different image backbones were used in the pretraining and finetuning phases. However, in our GPT4Point, we only use the training stage in the BLIP-2, and all tasks are evaluated by zero-shot. We need to make the learning rate very small for the diffusion branch because we only train the fully connected

layers here. The init, min, and warmup learning rates are 1e-7, 0, and 1e-8, and we only train one epoch.

### E.2. Point-text Captions and QA Demos

In this section, we delve deeper into the qualitative assessment of GPT4Point’s performance. Specifically, we explore additional examples showcasing its proficiency in understanding point clouds and engaging in meaningful conversations with users. Referencing Fig. S10, we present specific instances where GPT4Point accurately generates text descriptions corresponding to point cloud inputs, demonstrating its robustness and effectiveness in point-text tasks.

### E.3. Point Diffusion Results

In Fig. S5, additional qualitative outcomes of the point diffusion process by GPT4Point are depicted. Notably, GPT4Point adeptly directs the text-to-3D conversion, yielding outputs characterized by enhanced fidelity in both color representation and geometric form.

| Content                                           | Figure   |
|---------------------------------------------------|----------|
| Appendix C.1: 2 types of short annotation prompts | Fig. S6  |
| Appendix C.1: 2 types of long annotation prompts  | Fig. S7  |
| Appendix C.1: Level 3 caption finetune Point-E    | Fig. S11 |
| Appendix D.1: ObjaverseXL-LVIS QA Data            | Fig. S8  |
| Appendix D.2: Generation Failure Cases            | Fig. S9  |
| Appendix E.2: Point-text Captions and QA          | Fig. S10 |
| Appendix E.3: Point Diffusion Results             | Fig. S5  |

Table S3. **Chapter-Experiment Result Image Correspondence.**



### ChatGPT-based Level 2 Caption

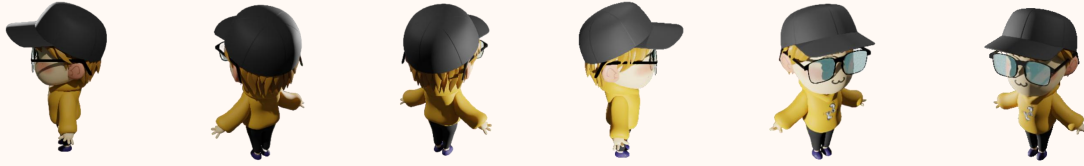

#### Context

- View1: a 3d character standing on a wooden floor in a gray hat    View2: this is an image of the boy wearing a hat
- View3: a rendered 3d model of a man with glasses    View4: a 3d rendering of a little boy with glasses and a hat
- View5: cartoon child with blonde hair in a hat and sweater    View6: a 3d looking character with a hat and jacket on

#### Instruction

You'll be showed **6 different angles** descriptions(such as front, side and back view) of an object/scene, please tell me what is it(usually a singular thing/a scene, you must judge) and its feature.

**Notice:** There are errors in the description of some angles(due to occlusion or improper angle), and you need to **combine all the descriptions** of the same object/scene and **identify possible error** descriptions(please fix this error directly, don't tell me) of this singular thing.

**Descriptions:** {context}

Tell me **what is it** and **its feature(if mentioned)** in **less than 30 words**, please don't be redundant.

**Unwanted words:** 'background', 'render', 'grey', 'image', 'foggy', '3D', '2D', 'surface'

**Reply:** It is

#### Output

**A character wearing a hat and glasses, possibly a little boy, with blonde hair and a jacket.**

### ChatCaptioner-based Level 3 Short QA

#### Context

Tell me details about the image.

What kind of thing it is?(object, person, cartoon character or house)

ChatGPT / Vicuna  
Questioner

BLIP2  
Answerer

Is the hoodie a zipper or a pullover?

Cartoon character

Pullover

Is the hat a cap or a fedora?

Cap

Does the cartoon character have any visible tattoos or markings?

No

Does the cap have any visible logos or patterns on it?

No

What color is the hoodie?

Yellow

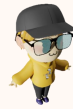

A 3D cartoon character wearing glasses, a hat, and a yellow hoodie.

#### Instruction

I have an image of a 3D thing. Ask me questions about the content of this image.

Carefully asking me informative and specific questions to maximize your information about this image content. Each time ask one question only without giving an answer.

If it is **an object**, ask me about its geometry shape, composed of what, quantity, usage and indicate what each object is (if multiple) and especially some specific details. If it is **a person/cartoon character**, ask me about its wearing, its posture, what it is doing and its possible job. If it is **a house**, ask me questions about its components, its surroundings and its type or shape. You are free to play with some questions depending on the context, but don't be unrealistic.

Avoid asking colors. Avoid asking materials. Avoid mention the background. Don't ask repeated questions!

Figure S6. Prompts of Level 2 Caption and Level 3 Short Q&A in Pyramid-XL. We present the construction process of GPT-based Level 2 Caption and ChatCaptioner-based Level 3 Short Q&A, along with the prompts utilized, consisting of context and instruction.

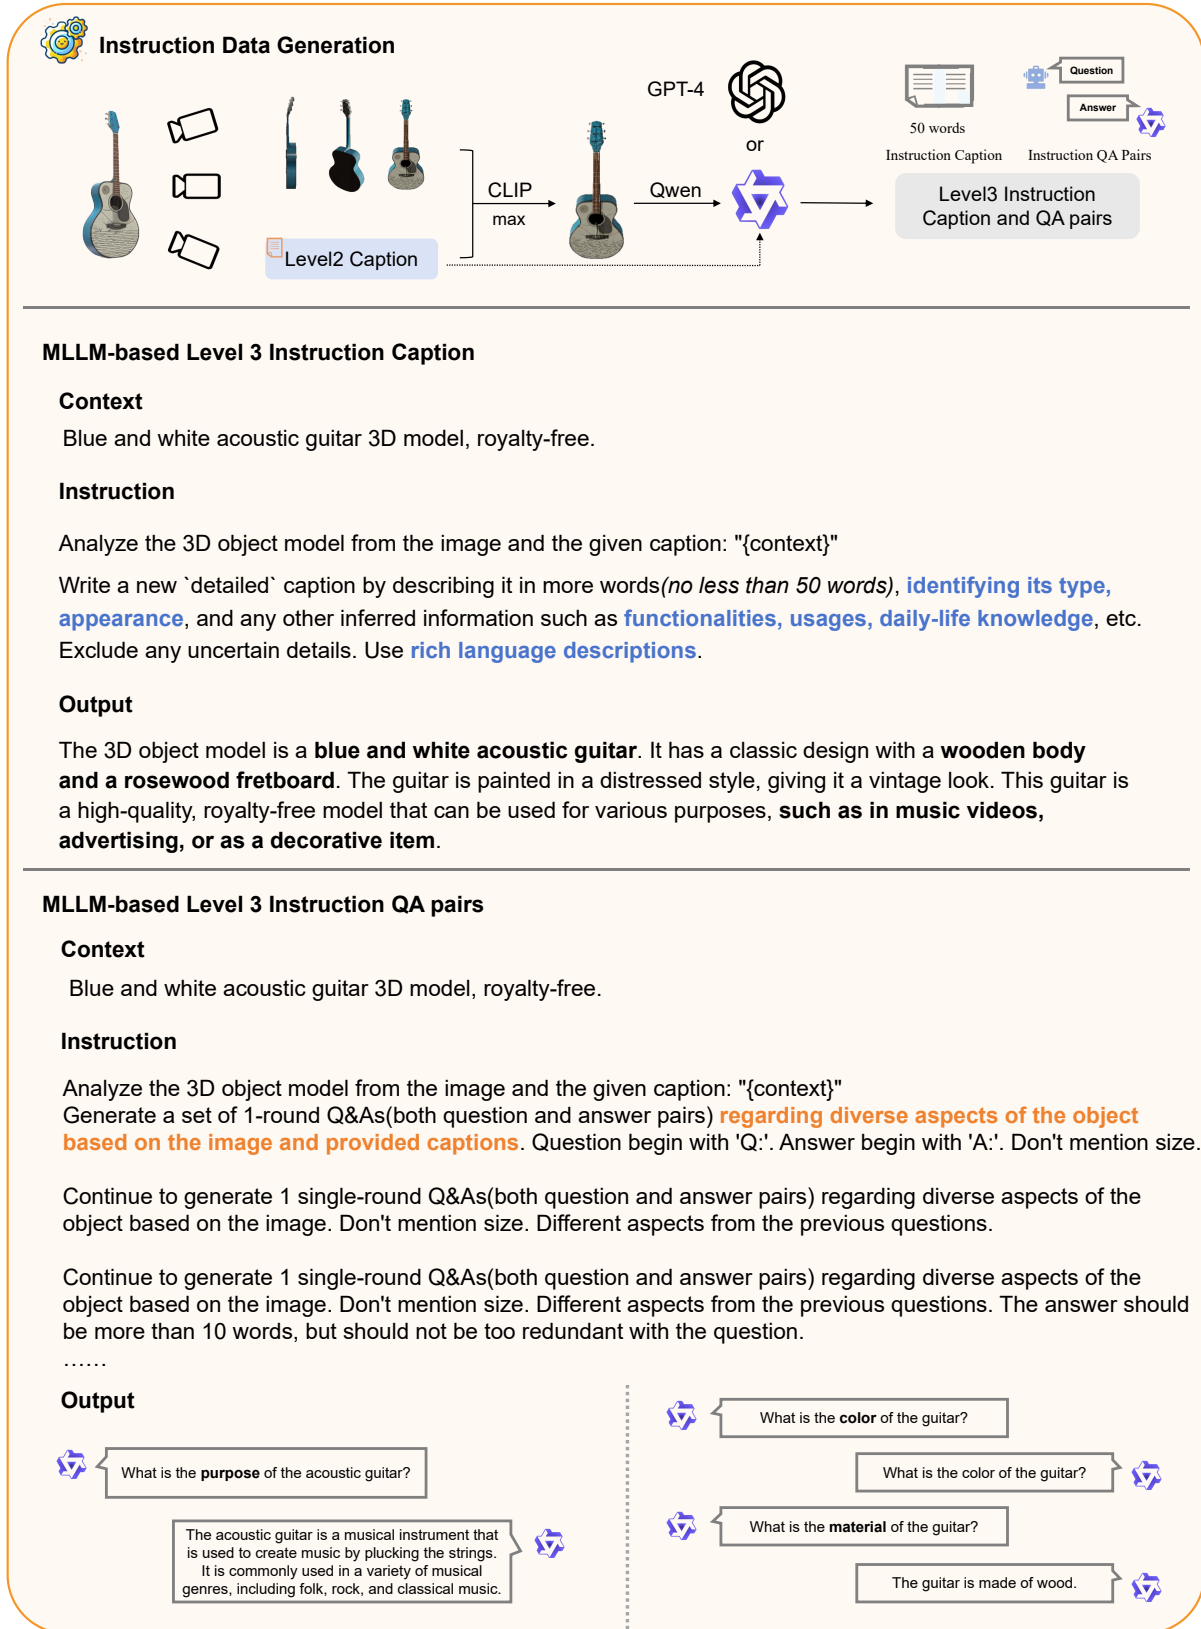

Figure S7. Prompts of MLLM-based Level 3 Instruction Caption and QA pairs in Pyramid-XL. The top part details the process of constructing the dataset, while below are the specific instructions provided to the MLLM (Qwen-VL[xx]) and the model output.

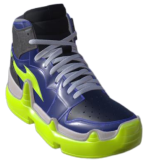

Tell me details about the image.

3D model of a blue and yellow Nike Air Swoosh high-top sneaker with a yellow sole.

What does the object look like?

A shoe.

Is the shoe a sneaker?

Yes.

What is the color of the shoe?

Blue and yellow.

Is the sole of the shoe yellow?

Yes.

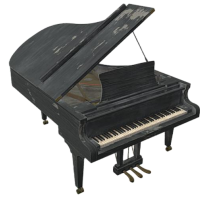

Tell me details about the image.

A 3D model of a black grand piano.

What is the composition of the grand piano?

It is made of wood.

What does the grand piano consist of?

A keyboard and a case.

What is the purpose of the grand piano?

To play music.

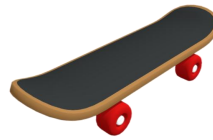

Tell me details about the image.

3D model of a skateboard with red wheels.

What is the color of the skateboard?

Black.

How many wheels does the skateboard have?

4.

What color are the wheels?

Red.

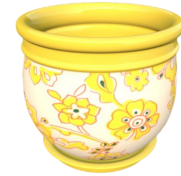

Tell me details about the image.

3D model of a blue and yellow Nike Air Swoosh high-top sneaker with a yellow sole.

What is the color of the flower pot?

Yellow and white.

What kind of flower is in the pot?

No flower.

Is it made of ceramic or plastic?

Ceramic.

What is the purpose of the flower pot?

To hold flowers.

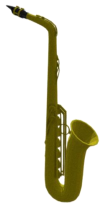

Yellow saxophone.

What is the color of the saxophone?

The saxophone is yellow.

What is the shape of the saxophone?

The saxophone is curved and cylindrical in shape.

What is the purpose of the saxophone?

The saxophone is a musical instrument used in jazz and classical music, known for its distinctive sound and versatility.

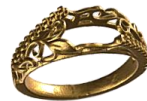

A yellow gold ring with an intricate filigree design.

What is the shape of the ring?

The ring has a round shape, with a filigree design on the top.

What is the color of the ring?

The ring is yellow gold, which gives it a warm and luxurious appearance.

What is the purpose of the filigree design on the ring?

The filigree design on the ring serves as a decorative element, adding an intricate and elegant touch to the overall appearance of the ring.

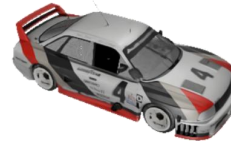

3D model of a racing car.

What is the color scheme of the racing car?

The racing car has a white and red color scheme, with black accents on the wheels and other parts of the car.

What is the purpose of the racing car?

The purpose of the racing car is to compete in a rally race.

What is the design of the racing car?

The racing car has a sleek and aerodynamic design, with a low profile and wide wheels.

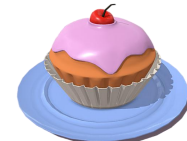

3D model of a cupcake with a cherry on top, placed on a plate.

What is the main ingredient of the cupcake?

The main ingredient of the cupcake is flour.

What is on top of the cupcake?

There is a cherry on top of the cupcake.

What is the dish the cupcake is placed on?

The cupcake is placed on a blue plate.

Figure S8. **Objaverse-XL QA dataset.** The upper section of the dataset features short Q&A samples, and the lower part includes long Q&A samples covering color, shape, type, material, and purpose. The short Q&A dataset evaluates performance, while the long Q&A is for finetuning, promoting more detailed language generation, and promoting understanding and conversational capabilities.

## 2D MLLM



Does it have one body or multiple bodies? 🧑

The image depicts **a single body** performing a trick on a bicycle.



How many tails does it have? 🧑

The image shows a rooster with **two tails**.



How many heads does the bird have? 🧑

The bird in the image has **a head**.

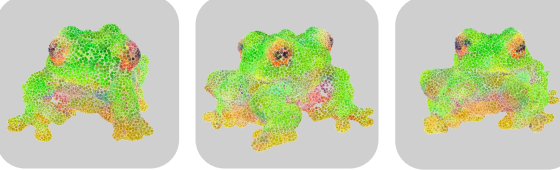

Is the frog one head? 🧑

Yes, the frog has **one head**.

## GPT4Point



Does it have one body or multiple bodies? 🧑

The 3D object model is made up of **multiple bodies**, each with a different shape and size.

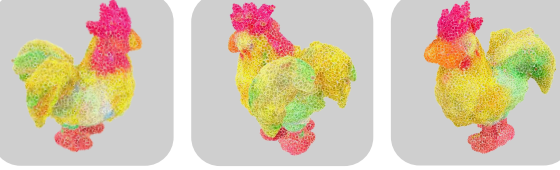

How many tails does it have? 🧑

It has **two tails**, one on each side.



How many heads does the bird have? 🧑

There are **two heads** on the bird.

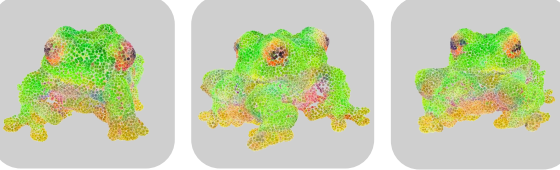

Is the frog one head? 🧑

No, the frog has **two heads**.

Figure S9. **Anomalous Objects: Generation Failure Cases.** The upper and lower parts, respectively, depict the performance of 2D MLLM and GPT4Point in identifying abnormally generated objects with multi-body and multi-head structures. GPT4Point effectively makes accurate judgments, whereas 2D MLLM fails to correctly identify most cases due to the lack of information from single-view images.



|                                                                                                                                                                                                                                                                                                                                                                                                                                                                     |                                                                                                                                                                                                                                                                                                                                                                                                                                                                                                          |                                                                                                                                                                                                                                                                                                                                                                                                                                                                                                                                                                                                                |
|---------------------------------------------------------------------------------------------------------------------------------------------------------------------------------------------------------------------------------------------------------------------------------------------------------------------------------------------------------------------------------------------------------------------------------------------------------------------|----------------------------------------------------------------------------------------------------------------------------------------------------------------------------------------------------------------------------------------------------------------------------------------------------------------------------------------------------------------------------------------------------------------------------------------------------------------------------------------------------------|----------------------------------------------------------------------------------------------------------------------------------------------------------------------------------------------------------------------------------------------------------------------------------------------------------------------------------------------------------------------------------------------------------------------------------------------------------------------------------------------------------------------------------------------------------------------------------------------------------------|
|  <p>Elaborate on the details of this point cloud, please.</p> <p>The 3D object model is a <b>green and white leather sofa</b>, a type of furniture commonly used in living rooms and bedrooms the sofa <b>has a sleek and modern design</b>, with clean lines and a minimalist.</p>                                                                                                |  <p>Give a thorough rundown of this point cloud.</p> <p>The 3D object model in the image is a <b>yellow dress</b>, which is a type of clothing typically worn for <b>special occasions such as weddings, proms</b>, and other formal events the dress has a simple and elegant design.</p>                                                                                                                              |  <p>Give a thorough rundown of this point cloud.</p> <p>The 3D object model in the image is a <b>brown suitcase</b>, which is a type of luggage commonly used for travel it has a <b>rectangular shape and a handle</b> on the top, making it easy to carry the suitcase is made of durable materials and features a sturdy design.</p>                                                                                                                                                                                     |
|  <p>What is the snowman's facial features?</p> <p>The snowman has a top hat, a carrot nose, and a smile.</p> <p>What is the snowman's clothing?</p> <p>The snowman is wearing a top hat and a scarf.</p> <p>What is the snowman's pose?</p> <p>The snowman is standing with its arms outstretched.</p>                                                                             |  <p>What is the material of the wicker basket?</p> <p>The wicker basket is made of wood.</p> <p>What is the color of the wicker basket?</p> <p>The wicker basket is brown in color.</p> <p>What is the purpose of the wicker basket?</p> <p>The purpose of the wicker basket is to hold food and other items</p> <p>What is the dish the wicker basket is placed on?</p> <p>The wicker basket is placed on a plate.</p> |  <p>What is the color of the telephone?</p> <p>The color of the telephone is black.</p> <p>What is the purpose of the telephone?</p> <p>The telephone is used for making and receiving phone calls.</p> <p>What is the function of the dial pad on the telephone?</p> <p>The dial pad on the telephone is used for dialing numbers.</p>                                                                                                                                                                                     |
|  <p>What is the material of the skateboard ramp?</p> <p>The skateboard ramp is made of wood.</p> <p>What is the purpose of the fence around the skateboard ramp?</p> <p>The purpose of the fence around the skateboard ramp is to prevent skaters from falling off the ramp.</p> <p>What is the shape of the skateboard ramp?</p> <p>The skateboard ramp has a curved shape.</p> |  <p>What is the color of the toy ambulance?</p> <p>The toy ambulance is red and white.</p> <p>What is the material of the toy ambulance?</p> <p>The toy ambulance is made of plastic.</p> <p>What is the purpose of the toy ambulance?</p> <p>The purpose of the toy ambulance is to provide a fun and educational experience for children.</p>                                                                       |  <p>What is the color of the roof of the house in the 3D model?</p> <p>The roof of the house in the 3D model is blue.</p> <p>What material is used to construct the roof of the house in the 3D model?</p> <p>The roof of the house in the 3d model is made of wood.</p> <p>What is the function of the blue and purple lines on the roof of the house in the 3D model?</p> <p>The blue and purple lines on the roof of the house in the 3d model are likely there to provide support and stability to the structure.</p> |

Figure S10. **Point-text Captions and QA Demos.** We use the finetuned GPT4Point with OPT6.7B model to generate results on the test set, demonstrating that our model performs well on dense captioning tasks and long (instruction) question answering. The results show our model's capability to comprehend object color and geometry information.

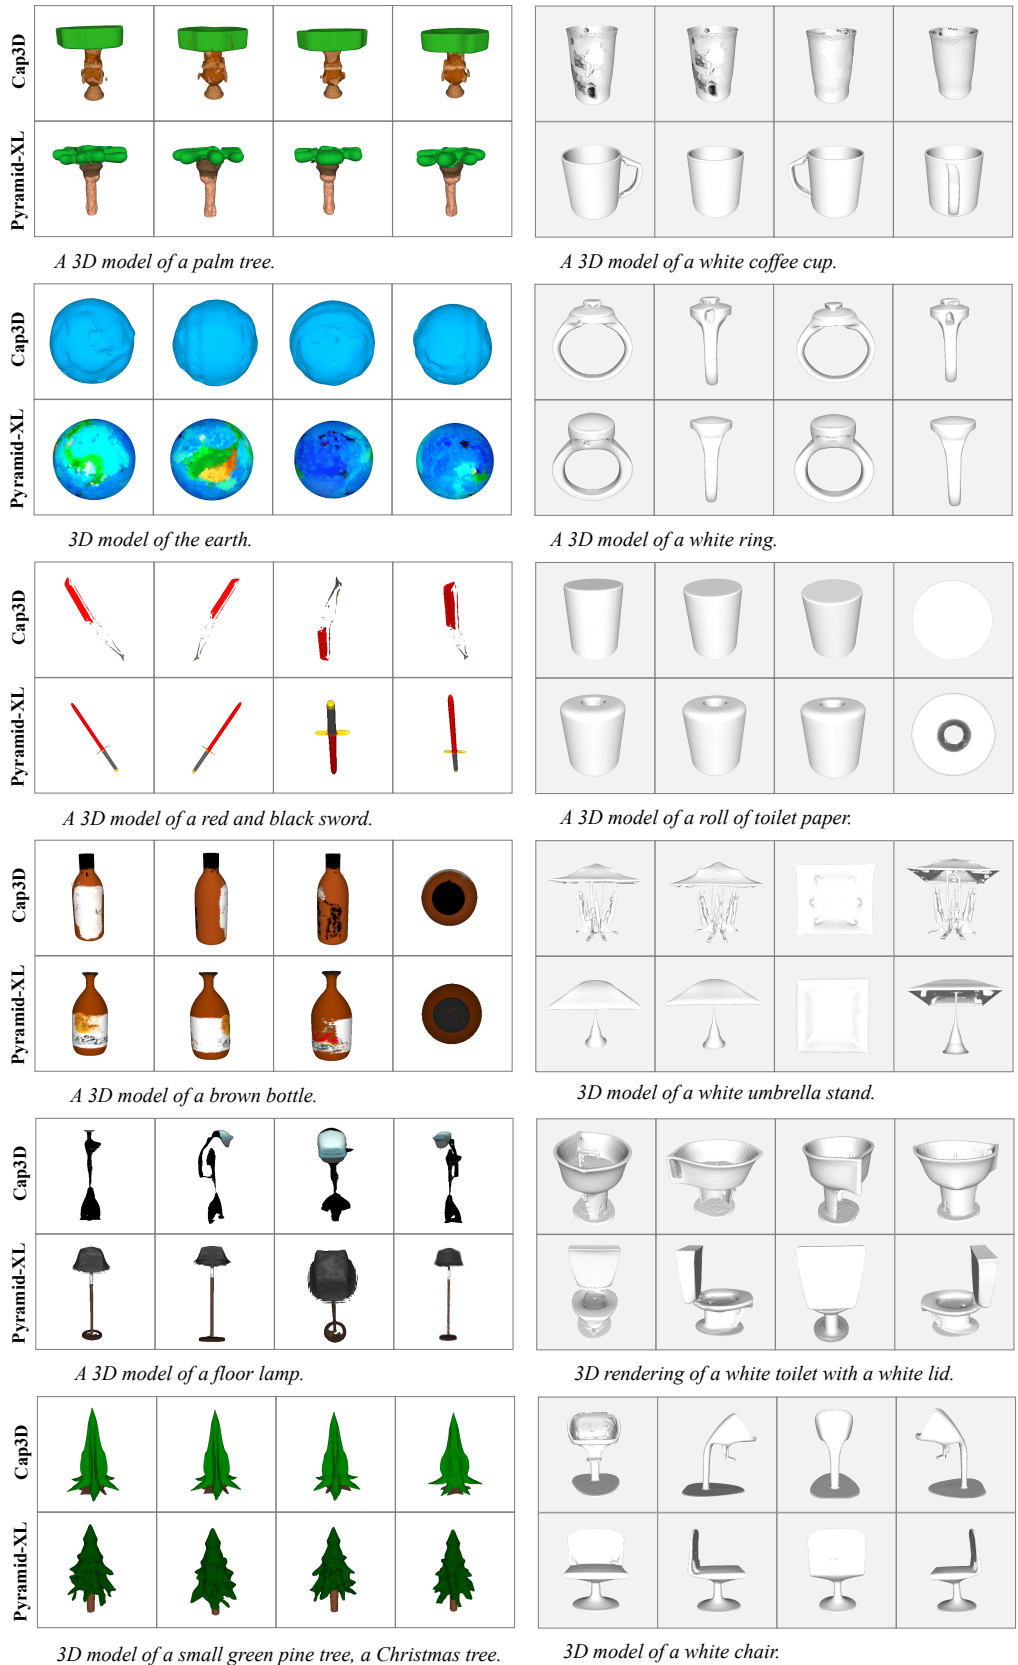

Figure S11. **Pyramid-XL Level 3 Point-E Finetune Results.** We found that the results of finetuning with dense captions from our Pyramid-XL significantly outperform those finetuned with Cap3D captions, demonstrating the greater accuracy of the captions we generated.

## References

- [1] Jinze Bai, Shuai Bai, Shusheng Yang, Shijie Wang, Sinan Tan, Peng Wang, Junyang Lin, Chang Zhou, and Jingren Zhou. Qwen-vl: A versatile vision-language model for understanding, localization, text reading, and beyond. *arXiv:2308.12966*, 2023. 2, 3
- [2] Guo Chen, Yin-Dong Zheng, Jiahao Wang, Jilan Xu, Yifei Huang, Junting Pan, Yi Wang, Yali Wang, Yu Qiao, Tong Lu, et al. Videollm: Modeling video sequence with large language models. *arXiv:2305.13292*, 2023. 1
- [3] Rui Chen, Yongwei Chen, Ningxin Jiao, and Kui Jia. Fantasia3d: Disentangling geometry and appearance for high-quality text-to-3d content creation. In *ICCV*, 2023. 3
- [4] Wei-Lin Chiang, Zhuohan Li, Zi Lin, Ying Sheng, Zhanghao Wu, Hao Zhang, Lianmin Zheng, Siyuan Zhuang, Yonghao Zhuang, Joseph E. Gonzalez, Ion Stoica, and Eric P. Xing. Vicuna: An open-source chatbot impressing gpt-4 with 90%\* chatgpt quality, 2023. 1, 2, 3
- [5] Matt Deitke, Ruoshi Liu, Matthew Wallingford, Huong Ngo, Oscar Michel, Aditya Kusupati, Alan Fan, Christian Laforte, Vikram Voleti, Samir Yitzhak Gadre, Eli VanderBilt, Aniruddha Kembhavi, Carl Vondrick, Georgia Gkioxari, Kiana Ehsani, Ludwig Schmidt, and Ali Farhadi. Objaverse-xl: A universe of 10m+ 3d objects. In *NeurIPS*, 2023. 2
- [6] Matt Deitke, Dustin Schwenk, Jordi Salvador, Luca Weihs, Oscar Michel, Eli VanderBilt, Ludwig Schmidt, Kiana Ehsani, Aniruddha Kembhavi, and Ali Farhadi. Objaverse: A universe of annotated 3d objects. In *CVPR*, 2023. 2
- [7] Danny Driess, Fei Xia, Mehdi SM Sajjadi, Corey Lynch, Aakanksha Chowdhery, Brian Ichter, Ayzan Wahid, Jonathan Tompson, Quan Vuong, Tianhe Yu, et al. Palm-e: An embodied multimodal language model. In *ICML*, 2020. 1
- [8] Yining Hong, Haoyu Zhen, Peihao Chen, Shuhong Zheng, Yilun Du, Zhenfang Chen, and Chuang Gan. 3d-llm: Injecting the 3d world into large language models. In *NeurIPS*, 2023. 1
- [9] Rongjie Huang, Mingze Li, Dongchao Yang, Jiatong Shi, Xuankai Chang, Zhenhui Ye, Yuning Wu, Zhiqing Hong, Jiawei Huang, Jinglin Liu, et al. Audioqpt: Understanding and generating speech, music, sound, and talking head. In *AAAI*, 2024. 1
- [10] Yukun Huang, Jianan Wang, Yukai Shi, Xianbiao Qi, Zheng-Jun Zha, and Lei Zhang. Dreamtime: An improved optimization strategy for text-to-3d content creation. In *ICLR*, 2024. 3
- [11] Dongxu Li, Junnan Li, and Steven CH Hoi. Blip-diffusion: Pre-trained subject representation for controllable text-to-image generation and editing. In *NeurIPS*, 2023. 3
- [12] Junnan Li, Dongxu Li, Silvio Savarese, and Steven Hoi. Blip-2: Bootstrapping language-image pre-training with frozen image encoders and large language models. In *ICML*, 2023. 1, 2, 4
- [13] Haotian Liu, Chunyuan Li, Qingyang Wu, and Yong Jae Lee. Visual instruction tuning. In *NeurIPS*, 2023. 1
- [14] Tiange Luo, Chris Rockwell, Honglak Lee, and Justin Johnson. Scalable 3d captioning with pretrained models. In *NeurIPS*, 2023. 2
- [15] Alex Nichol, Heewoo Jun, Prafulla Dhariwal, Pamela Mishkin, and Mark Chen. Point-e: A system for generating 3d point clouds from complex prompts. *arXiv:2212.08751*, 2022. 2
- [16] OpenAI. Chatgpt. <https://openai.com/blog/chatgpt>, 2022. 1
- [17] OpenAI. GPT-4 technical report, 2023. 1
- [18] Alec Radford, Jong Wook Kim, Chris Hallacy, Aditya Ramesh, Gabriel Goh, Sandhini Agarwal, Girish Sastry, Amanda Askell, Pamela Mishkin, Jack Clark, et al. Learning transferable visual models from natural language supervision. In *ICML*, 2021. 1, 2
- [19] Jiayang Tang, Jiawei Ren, Hang Zhou, Ziwei Liu, and Gang Zeng. Dreamgaussian: Generative gaussian splatting for efficient 3d content creation. In *ICLR*, 2024. 3
- [20] Hugo Touvron, Thibaut Lavril, Gautier Izacard, Xavier Martinet, Marie-Anne Lachaux, Timothée Lacroix, Baptiste Rozière, Naman Goyal, Eric Hambro, Faisal Azhar, et al. Llama: Open and efficient foundation language models. *arXiv:2302.13971*, 2023. 1
- [21] Christina Tsalioglou, Fabian Manhardt, Alessio Tonioni, Michael Niemeyer, and Federico Tombari. Textmesh: Generation of realistic 3d meshes from text prompts. *arXiv:2304.12439*, 2023. 3
- [22] Haowei Wang, Jiji Tang, Jiayi Ji, Xiaoshuai Sun, Rongsheng Zhang, Yiwei Ma, Minda Zhao, Lincheng Li, Zeng Zhao, Tangjie Lv, et al. Beyond first impressions: Integrating joint multi-modal cues for comprehensive 3d representation. In *ACMMM*, 2023. 3
- [23] Jason Wei, Maarten Bosma, Vincent Zhao, Kelvin Guu, Adams Wei Yu, Brian Lester, Nan Du, Andrew M Dai, and Quoc V Le. Finetuned language models are zero-shot learners. In *ICLR*, 2021. 1
- [24] Xumin Yu, Lulu Tang, Yongming Rao, Tiejun Huang, Jie Zhou, and Jiwen Lu. Point-bert: Pre-training 3d point cloud transformers with masked point modeling. In *CVPR*, 2022. 1
- [25] Susan Zhang, Stephen Roller, Naman Goyal, Mikel Artetxe, Moya Chen, Shuohui Chen, Christopher Dewan, Mona Diab, Xian Li, Xi Victoria Lin, et al. Opt: Open pre-trained transformer language models. *arXiv:2205.01068*, 2022. 1
- [26] Deyao Zhu, Jun Chen, Kilichbek Haydarov, Xiaoqian Shen, Wenxuan Zhang, and Mohamed Elhoseiny. Chatgpt asks, blip-2 answers: Automatic questioning towards enriched visual descriptions. *TMLR*, 2024. 2
